# Supplementary material for: Neonatal mortality and its determinates in public hospitals of Gamo and Gofa zones, southern Ethiopia: prospective follow up study
Source: Springer Nature journal article supplement (doi:10.1186/s12887-019-1881-0), 2019-12-01
Supplement: MOESM1 [file 17678868]

## English Version Tool

### Phase one Interview and Record Review

### Identification Number

| SNo                                                            | Questions                                        | Response                                                                                | Skip |
|----------------------------------------------------------------|--------------------------------------------------|-----------------------------------------------------------------------------------------|------|
| <b>Part I: Identifications</b>                                 |                                                  |                                                                                         |      |
| 101                                                            | Hospital Name                                    | a. AMGH<br>b. Chenchu Primary Hospital<br>c. Sawla General Hospital                     |      |
| 102                                                            | Hospital code                                    | ___/___/___                                                                             |      |
| 103                                                            | Date form filled to start                        | ___/___/___                                                                             |      |
| 104                                                            | Woreda/District                                  | _____                                                                                   |      |
| 105                                                            | Kebele                                           | _____                                                                                   |      |
| 106                                                            | Village                                          | _____                                                                                   |      |
| 107                                                            | Phone number (anyone who are immediate response) |                                                                                         |      |
| 108                                                            | Health Center in the surround                    |                                                                                         |      |
| 109                                                            | Health Post in the surround                      |                                                                                         |      |
| 110                                                            | Health extension worker name and phone number    |                                                                                         |      |
| 111                                                            | Admission date                                   | ___/___/___EC                                                                           |      |
| 112                                                            | Maternity record number/Medical Reg. Number      | _____                                                                                   |      |
| 113                                                            | Admission mode                                   | a. Self-referred<br>b. Referred from another facility                                   |      |
| 114                                                            | Means of transport used                          | a. Ambulance<br>b. Public transport<br>c. Personal vehicle<br>d. Other, specify _____   |      |
| <b>Part II: Socio-demographic and economic characteristics</b> |                                                  |                                                                                         |      |
| 201                                                            | How old are you?                                 | _____ (in completed year)                                                               |      |
| 202                                                            | What is your marital status?                     | a. Married<br>b. Single<br>c. Widowed<br>d. Divorced<br>e. Separated due to work        |      |
| 203                                                            | What is your ethnicity?                          | _____                                                                                   |      |
| 204                                                            | What is mother's educational status?             | a. No formal education<br>b. Primary(1-8)<br>c. Secondary(9-12)<br>d. College and above |      |
| 205                                                            | What is paternal educational status?             | a. No formal education<br>b. Primary (1-8)                                              |      |

|                                                                                                                     |                                                                           |                                                                                              |       |
|---------------------------------------------------------------------------------------------------------------------|---------------------------------------------------------------------------|----------------------------------------------------------------------------------------------|-------|
|                                                                                                                     |                                                                           | c. Secondary (9-12)<br>d. College and above                                                  |       |
| 206                                                                                                                 | What is your religion?                                                    | a. Orthodox<br>b. Catholic<br>c. Protestant<br>d. Muslim<br>e. Traditional                   |       |
| 207                                                                                                                 | What is the occupation of the mother?                                     | a. House wife<br>b. Merchant<br>c. Government employer<br>d. Daily laborer                   |       |
| 208                                                                                                                 | What is the occupation of the father?                                     | a. Farmer<br>b. Merchant<br>c. Government employer<br>d. Wavier<br>e. Daily laborer          |       |
| 209                                                                                                                 | Where is the place of residence?                                          | a. Urban<br>b. Rural                                                                         |       |
| 210                                                                                                                 | How much is your family average income per month?                         | _____ (ETB)                                                                                  |       |
| <b>Part III: Maternal Factors related questions (Record review if it is available, if not interview the mother)</b> |                                                                           |                                                                                              |       |
| 301                                                                                                                 | Number of pregnancies (gravidity)?                                        | _____ (in number) If primi                                                                   | → 401 |
| 302                                                                                                                 | Number of birth orders (parity)?                                          | _____ (in number)                                                                            |       |
| 303                                                                                                                 | Do you pervious history of still birth?                                   | a. Yes<br>b. No                                                                              |       |
| 304                                                                                                                 | Do you pervious history of abortion?                                      | a. Yes<br>b. No                                                                              |       |
| 305                                                                                                                 | The duration between the current birth and the preceding birth in months? | _____ (in months)                                                                            |       |
| 306                                                                                                                 | Do you have pervious history of neonatal death?                           | a. Yes<br>b. No                                                                              |       |
| <b>Part IV: Maternal and child health care questions (similar with part III)</b>                                    |                                                                           |                                                                                              |       |
| 401                                                                                                                 | Did the woman receive antenatal care?                                     | a. Yes<br>b. No                                                                              | → 403 |
| 402                                                                                                                 | If yes, number of visits                                                  | _____                                                                                        |       |
| 403                                                                                                                 | Do you have immediate PNC visit?                                          | a. Yes<br>b. No                                                                              |       |
| <b>Part V: Obstetric related questions (Record review/interview)</b>                                                |                                                                           |                                                                                              |       |
| 501                                                                                                                 | Date of delivery or end of pregnancy                                      | ___/___/___                                                                                  |       |
| 502                                                                                                                 | Mode of delivery                                                          | a. Spontaneous vaginal delivery<br>b. Instrumental assisted delivery<br>c. Caesarean section |       |

|     |                             |                                                                                                                                                                                                                                                                                                          |       |
|-----|-----------------------------|----------------------------------------------------------------------------------------------------------------------------------------------------------------------------------------------------------------------------------------------------------------------------------------------------------|-------|
| 503 | Hemorrhage                  | a. Yes<br>b. No                                                                                                                                                                                                                                                                                          | → 505 |
| 504 | If, yes                     | a. Placenta praevia<br>b. Placenta accreta/increta/percreta<br>c. Retro-placental haematoma<br>d. Other first trimester hemorrhage<br>e. Hemorrhage during delivery (no other specification)<br>f. Uterine rupture<br>g. Postpartum hemorrhage (no other specification)<br>h. Other obstetric hemorrhage |       |
| 505 | Premature rupture of member | a. Yes<br>b. No                                                                                                                                                                                                                                                                                          |       |
| 506 | Hypertension                | a. Yes<br>b. No                                                                                                                                                                                                                                                                                          | → 508 |
| 507 | If, Yes                     | a. Pre-eclampsia<br>b. Eclampsia<br>c. HELLP<br>d. Chronic hypertension<br>e. Gestational hypertension                                                                                                                                                                                                   |       |
| 508 | Anaemia (Hb < 11g/dl)       | a. Yes<br>b. No                                                                                                                                                                                                                                                                                          | → 510 |
| 509 | If, Yes                     |                                                                                                                                                                                                                                                                                                          |       |
|     | a. Haemoglobin level (g/dl) | _____                                                                                                                                                                                                                                                                                                    |       |
|     | b. Unknown                  |                                                                                                                                                                                                                                                                                                          |       |
| 510 | Infection                   | a. Yes<br>b. No                                                                                                                                                                                                                                                                                          | → 512 |
| 511 | If, Yes                     | a. Unspecified infection<br>b. Puerperal endometritis<br>c. Pyelonephritis<br>d. Septicaemia<br>e. Peritonitis<br>f. Parietal suppuration<br>g. Malaria<br>h. Syphilis<br>i. Other systemic infection                                                                                                    |       |
| 512 | Dystocia                    | a. Yes<br>b. No                                                                                                                                                                                                                                                                                          | → 514 |
| 513 | If, Yes                     | a. Uterine pre-rupture<br>b. Prolonged labour<br>c. Foeto-pelvic disproportion                                                                                                                                                                                                                           |       |
| 514 | Other pathologies           | a. Yes<br>b. No                                                                                                                                                                                                                                                                                          | → 516 |

|     |                                                            |                                                                                                                                                                    |  |
|-----|------------------------------------------------------------|--------------------------------------------------------------------------------------------------------------------------------------------------------------------|--|
| 515 | If, Yes                                                    | a. HIV/AIDS<br>b. Embolic diseases<br>(thrombosis/amniotic fluid or<br>gaseous embolism<br>c. Heart disease<br>d. Sickle-cell disease<br>e. Other (specify: _____) |  |
| 516 | <b>Newborn</b>                                             |                                                                                                                                                                    |  |
|     | <b>A. Presentation</b>                                     | a. Cephalic<br>b. Breech<br>c. Transverse/face/brow<br>d. Other, specify _____                                                                                     |  |
|     | <b>B. Sex</b>                                              | a. Male<br>b. Female<br>c. Unknown                                                                                                                                 |  |
|     | <b>C. Birth trauma</b>                                     | a. Yes<br>b. No                                                                                                                                                    |  |
|     | <b>D. If the above response is yes</b>                     | Specify, _____                                                                                                                                                     |  |
|     | <b>E. Baby referred to another facility?</b>               | a. Yes<br>b. No                                                                                                                                                    |  |
|     | <b>F. Admitted to special care or intensive care unit?</b> | a. Yes<br>b. No                                                                                                                                                    |  |

**Fill This Check List If the Neonate Died**

**The respondent for this check list will be either health care provider or anyone who are relationship with deceased neonate**

| <b>Part VII: Check List Two (only fill if the neonate is died)</b>                                                                                                                                                                                                                                                                                                                                                                                                                                                                                                                                                                                                                                                                                                                                                                                                                                                                                                                                                                                                                                                                                                |                                                                             |                                                                                                                            |             |
|-------------------------------------------------------------------------------------------------------------------------------------------------------------------------------------------------------------------------------------------------------------------------------------------------------------------------------------------------------------------------------------------------------------------------------------------------------------------------------------------------------------------------------------------------------------------------------------------------------------------------------------------------------------------------------------------------------------------------------------------------------------------------------------------------------------------------------------------------------------------------------------------------------------------------------------------------------------------------------------------------------------------------------------------------------------------------------------------------------------------------------------------------------------------|-----------------------------------------------------------------------------|----------------------------------------------------------------------------------------------------------------------------|-------------|
| 601                                                                                                                                                                                                                                                                                                                                                                                                                                                                                                                                                                                                                                                                                                                                                                                                                                                                                                                                                                                                                                                                                                                                                               | <b>Does the newborn died after developing near miss criteria?</b>           | Yes<br>No                               | <b>Stop</b> |
| <b>Informed Consent Statement</b>                                                                                                                                                                                                                                                                                                                                                                                                                                                                                                                                                                                                                                                                                                                                                                                                                                                                                                                                                                                                                                                                                                                                 |                                                                             |                                                                                                                            |             |
| <p>Hello. My name is _____ and I am working with Arba Minch University. We are collecting information on the causes of death. We would very much appreciate your participation in this effort. We want to ask you about the circumstances leading to the death of the deceased. Whatever information you provide will be kept strictly confidential. No information identifying you or the deceased will ever be released to anyone outside of this information-collection activity.</p> <p>Participation in this survey is voluntary and you can choose not to answer any individual question or all of the questions. You may also stop the interview completely at any time without any consequences at all. However, we hope that you will participate in this survey since the results will help the government improve services for people.</p> <p>At this time, do you want to ask me anything about the purpose or content of this interview?<br/>May I begin the interview now?</p> <p>Signature of interviewer: _____ Date: _____</p> <p>Respondent Agrees To Be Interviewed <b><u>CONTINUE</u></b>, Not Agree To Be Interviewed <b><u>STOP</u></b></p> |                                                                             |                                                                                                                            |             |
| <b>Causes of Neonatal death</b>                                                                                                                                                                                                                                                                                                                                                                                                                                                                                                                                                                                                                                                                                                                                                                                                                                                                                                                                                                                                                                                                                                                                   |                                                                             |                                                                                                                            |             |
| 602                                                                                                                                                                                                                                                                                                                                                                                                                                                                                                                                                                                                                                                                                                                                                                                                                                                                                                                                                                                                                                                                                                                                                               | Is the mother alive at the time of interview?                               | a. Yes<br>b. No                                                                                                            |             |
| 603                                                                                                                                                                                                                                                                                                                                                                                                                                                                                                                                                                                                                                                                                                                                                                                                                                                                                                                                                                                                                                                                                                                                                               | Is the main respondent is health care provider?                             | a. Yes <br>b. No                      | <b>605</b>  |
| 604                                                                                                                                                                                                                                                                                                                                                                                                                                                                                                                                                                                                                                                                                                                                                                                                                                                                                                                                                                                                                                                                                                                                                               | If No, What is the relationship of the main respondent to deceased neonate? | a. Mother<br>b. Father<br>c. Grandfather<br>d. Grandmother<br>e. Uncle<br>f. Aunt<br>g. Other (Specify) _____              |             |
| 605                                                                                                                                                                                                                                                                                                                                                                                                                                                                                                                                                                                                                                                                                                                                                                                                                                                                                                                                                                                                                                                                                                                                                               | Where was the neonate died?                                                 | a. Hospital<br>b. Health center<br>c. Health post<br>d. On route to health facility<br>e. Home<br>f. Other (specify) _____ |             |
| 606                                                                                                                                                                                                                                                                                                                                                                                                                                                                                                                                                                                                                                                                                                                                                                                                                                                                                                                                                                                                                                                                                                                                                               | If the death was at health facility, record the facility name and address.  | Facility name _____<br>Date of admission _____                                                                             |             |

**Open history question**

607. Could you please tell me about the illness that led to the death of the neonate?  
 Instruction to interviewer: allow the respondent to tell you about the illness that led to the death of the neonate in her/his own words. Do not prompt except for asking “was there anything else” until the respondent says there was nothing else.

---

---

---

---

---

---

---

---

---

---

---

---

608. Take a moment to circle all items mentioned spontaneously in the open history questionnaire. Use the following to guide you through the rest of the questionnaire.  
 1. Diarrhea 2. Cough 3. Fever 4. Rash 5. Injure 6. Coma 7. Fit 8. Stiff neck 9. Tetanus  
 10. Measles 11. Kwashiorkor 12. Marasmus 13. Difficult breathing 14. Rapid breathing  
 15. Complicated delivery 16. Malformation 17. Very small at birth 18. Very thin 19. Born early  
 20. Pneumonia 21. Malaria 22. Jaundice 23. Other terms (specify)\_\_\_\_\_

|     |                                                                                                                                                                                          |                                                                                                                                                                                     |      |
|-----|------------------------------------------------------------------------------------------------------------------------------------------------------------------------------------------|-------------------------------------------------------------------------------------------------------------------------------------------------------------------------------------|------|
| 609 | What was the length of time the neonate was ill before he/she died?                                                                                                                      | _____(days)                                                                                                                                                                         |      |
| 610 | Was care (treatment) sought outside home while the neonate had this illness?                                                                                                             | a. Yes<br>b. No                                                                                                                                                                     | →612 |
| 611 | If Yes, from where was the care sought? (Multiple responses are possible, so prompt anywhere else)<br>1. Government hospital<br>2. Government health center<br>3. Government health post | a. Government hospital<br>b. Government health center<br>c. Government health post<br>d. Private clinic<br>e. Private pharmacy, drug store or drug vender<br>f. Other, specify_____ |      |
| 612 | Did the deceased neonate have any malformations at birth?                                                                                                                                | a. Yes<br>b. No                                                                                                                                                                     | →614 |
| 613 | If Yes, Where was the malformation? (Multiple answers are possible)                                                                                                                      | a. Head<br>b. Body<br>c. Arms/hands<br>d. Legs/feet<br>e. Other (Specify) _____                                                                                                     |      |

|     |                                                                                                               |                                                                                  |      |
|-----|---------------------------------------------------------------------------------------------------------------|----------------------------------------------------------------------------------|------|
| 614 | Was the neonate able to breath after birth?                                                                   | a. Yes<br>b. No                                                                  |      |
| 615 | Was the neonate able to suckle or bottle feed in a normal way after birth?                                    | a. Yes<br>b. No                                                                  |      |
| 616 | Did the neonate stop suckling in a normal way after starting?                                                 | a. Yes<br>b. No                                                                  | →619 |
| 617 | How long before death was the neonate stop suckling?                                                          | a. Less than 1 day<br>b. 1-2 day<br>c. More than 2 days                          |      |
| 618 | How long after birth (at what age) did the neonate stop suckling?                                             | a. Less than 1 day<br>b. 1-2 day<br>c. 3-7 days<br>d. 8-14 days<br>e. 15-28 days |      |
| 619 | Was the neonate able to cry after birth?                                                                      | a. Yes<br>b. No                                                                  |      |
| 620 | Did the neonate stop being able to cry?                                                                       | a. Yes<br>b. No                                                                  | →622 |
| 621 | If Yes, how long before death did the neonate stop suckling?                                                  | a. <1 day<br>b. 1 day or more                                                    |      |
| 622 | During the illness that led to death, did the neonate have spasm or convulsions?                              | a. Yes<br>b. No                                                                  |      |
| 623 | During the illness that led to death, did the neonate have become unconscious?                                | a. Yes<br>b. No                                                                  |      |
| 624 | During the illness that led to death, did the neonate have bulging fontanel?                                  | a. Yes<br>b. No                                                                  |      |
| 625 | During the illness that led to death, did the neonate have tetanus?                                           | a. Yes<br>b. No                                                                  |      |
| 626 | During the illness that led to death, did the neonate have yellow discolouration of eyes?                     | a. Yes<br>b. No                                                                  |      |
| 627 | During the illness that led to death, did the neonate have redness or drainage from the umbilical cord stump? | a. Yes<br>b. No                                                                  |      |
| 628 | During the illness that led to death, did the neonate have areas of skin that were red and hot?               | a. Yes<br>b. No                                                                  |      |
| 629 | During the illness that led to death, did the neonate have skin rash with bumps containing pus?               | a. Yes<br>b. No                                                                  |      |
| 630 | During the illness that led to death, did the neonate have fever?                                             | a. Yes, last for ___ days<br>b. No                                               |      |
| 631 | During the illness that led to death, did the neonate have frequent loose or liquid stools or diarrhea?       | a. Yes, last for ___ days<br>b. No                                               |      |
| 632 | During the illness that led to death, did the neonate cough?                                                  | a. Yes , last for ___ days<br>b. No                                              |      |

|     |                                                                                                            |                                     |               |
|-----|------------------------------------------------------------------------------------------------------------|-------------------------------------|---------------|
| 633 | During the illness that led to death, did the neonate have difficulty breathing?                           | a. Yes , last for ___ days<br>b. No |               |
| 634 | During the illness that led to death, did the neonate have fast breathing?                                 | a. Yes , last for ___ days<br>b. No |               |
| 635 | During the illness that led to death, did the neonate ever stop breathing for long time and started again? | a. Yes<br>b. No                     |               |
| 636 | During the illness that led to death, did the neonate have chest indrawing?                                | a. Yes<br>b. No                     |               |
| 637 | During the illness that led to death, did the neonate have flaring nostrils?                               | a. Yes<br>b. No                     |               |
| 638 | During the illness that led to death, did the neonate have pneumonia?                                      | a. Yes<br>b. No                     |               |
| 639 | Has the mother of the neonate ever been tested for HIV?                                                    | a. Yes<br>b. No                     | <b>→ Stop</b> |
| 640 | If Yes, was the HIV test ever positive?                                                                    | a. Yes<br>b. No                     |               |
| 641 | Has the mother of the neonate ever been told that she had “AIDS” by health worker?                         | a. Yes<br>b. No                     |               |

*Many Thanks!!!*



## Gammogna Version Questionnaire

*Shempo1 Qalan oyishetizanne Karideppe Maxetiza Oyisha Shakko payiddo*

| O.py                                      | Oyisha                             | Zarro                                                                                                  | Dhiko |
|-------------------------------------------|------------------------------------|--------------------------------------------------------------------------------------------------------|-------|
| <b>Basso 1: Shakko Oyishatta</b>          |                                    |                                                                                                        |       |
| 101                                       | Hospittale sunitha                 | a. Arba Mince ubba Hospittale<br>b. Cenchu Koyiro Detha Hospittale<br>c. Sawila koyiro ubba Hospittale |       |
| 102                                       | Hospittale kode                    | ____/____/____                                                                                         |       |
| 103                                       | Oyishay oyisheto domidda gallasa   | ____/____/____                                                                                         |       |
| 104                                       | Worrada                            | _____                                                                                                  |       |
| 105                                       | Kabale                             | _____                                                                                                  |       |
| 106                                       | Gutta                              | _____                                                                                                  |       |
| 107                                       | Silike payiddo                     |                                                                                                        |       |
| 108                                       | Guttan dizza xenna xabiya          |                                                                                                        |       |
| 109                                       | Guttan dizza xenna keela           |                                                                                                        |       |
| 110                                       | Xenna ekistenishine silike payiddo |                                                                                                        |       |
| 111                                       | Hospittale gelida gallasa          | ____/____/____                                                                                         |       |
| 112                                       | Hospittale kardde payiddo          | _____                                                                                                  |       |
| 113                                       | Hospittale yanas qofisiday         | a. Taffe<br>b. Hara xenna go7a immiza keetha                                                           |       |
| 114                                       | Ayibban yaddi                      | a. Amubulanissen<br>b. Dere gathiza makinani<br>c. Ta makinani<br>d. Harabba, yota_____                |       |
| <b>Basso II: Ayottaba Yottiza Hannota</b> |                                    |                                                                                                        |       |
| 201                                       | Ayotta layitha                     | _____ (kumetha layithan)                                                                               |       |
| 202                                       | Azzina gello hannota               | a. Gelladus<br>b. Shagetadus<br>c. Azzinay hayqides<br>d. Gellabuku<br>e. Osso gishaw hara bittan dees |       |
| 203                                       | Gita zare                          | _____                                                                                                  |       |
| 204                                       | Ayyi timirite tamarida hannota     | a. Timirte tamarabeyiku<br>b. 1-8 kifile<br>c. 9-12 kifile<br>d. Kollejenne kollejeppa adho            |       |
| 205                                       | Awwa timirite tamarida hannota     | a. Timirte tamarabeyinna                                                                               |       |

|                                                                                     |                                                          |                                                                                  |              |
|-------------------------------------------------------------------------------------|----------------------------------------------------------|----------------------------------------------------------------------------------|--------------|
|                                                                                     |                                                          | b. 1-8 kifile<br>c. 9-12 kifile<br>d. Kollejenne kollejeppe adho                 |              |
| 206                                                                                 | Amanno                                                   | a. Orotodokisse<br>b. Katolike<br>c. Missonne<br>d. Issilamma<br>e. Balle ammano |              |
| 207                                                                                 | Ayyi osso                                                | a. So ossanicha<br>b. Zali77e<br>c. Kawwo ossanicha<br>d. Wolikka osso           |              |
| 208                                                                                 | Awwa osso                                                | a. Gabarre<br>b. Zali77e<br>c. Kawwo ossanicha<br>d. Shemanne<br>e. Wolikka osso |              |
| 209                                                                                 | Dizza soho                                               | a. Kattama<br>b. Gaxarre                                                         |              |
| 210                                                                                 | Aginani ayi kenna birra demmeti?                         | _____ Birra                                                                      |              |
| <b>Basso III: Ayyi hannota oyishata (Karideppe xella woykko ayyiyo oyisha)</b>      |                                                          |                                                                                  |              |
| 301                                                                                 | Appunitho shaaradda?                                     | _____ (payiddon) <b>Koyirro</b>                                                  | <b>→ 401</b> |
| 302                                                                                 | Appunitho yeladdi?                                       | _____ (payiddon)                                                                 |              |
| 303                                                                                 | Hayissape sinthan gawon hayiqiddi yeletidda yeloy dizze? | a. Dees<br>b. Baawa                                                              |              |
| 304                                                                                 | Hayissape sinthan shaara wodhoy dizze?                   | a. Dees<br>b. Baawa                                                              |              |
| 305                                                                                 | Ha shaaraninne koyirro shaaran ayyi kenna haakoy dizze?  | _____ (agginani)                                                                 |              |
| 306                                                                                 | Suutha na hayiqoy dizze?                                 |                                                                                  |              |
| <b>Basso IV: Ayyotanne qerri nayitta hannota oyishata (Basso III maala kunitha)</b> |                                                          |                                                                                  |              |
| 401                                                                                 | Shaara kalethoy dizze?                                   | a. Dees<br>b. Baawa                                                              | <b>→ 403</b> |
| 402                                                                                 | Ayyi kenna kaaladi?                                      | _____                                                                            |              |
| 403                                                                                 | Yeloppe guyye kaalethoy/innikibikaabey dizze?            | a. Dees<br>b. Baawa                                                              |              |
| <b>Basso V: Yelo hannottaba oyishata (karideppe xella woyikko oyisha)</b>           |                                                          |                                                                                  |              |
| 501                                                                                 | Yelo gallasa?                                            | ____/____/____                                                                   |              |
| 502                                                                                 | Ayibban yeladdi?                                         | a. Medho oggen/maxenenni<br>b. Masaran madetada<br>d. Opereshinenni              |              |
| 503                                                                                 | Suutha gogoy dizze?                                      | a. Dees<br>b. Baawa                                                              | <b>→ 505</b> |

|     |                                              |                                                                                                                                                                                                                                                                                                                                                                                                            |  |
|-----|----------------------------------------------|------------------------------------------------------------------------------------------------------------------------------------------------------------------------------------------------------------------------------------------------------------------------------------------------------------------------------------------------------------------------------------------------------------|--|
| 504 | Boolan dizza oyishas zaaroy dees gidiko      | <ul style="list-style-type: none"> <li>a. “Pilasenta priva”</li> <li>b. “Pilasenta akirata/inkirata/perkirata”</li> <li>c. “Retiro-pilacenta hematoma”</li> <li>d. Harra koyirro hezantho aginna suutha googo</li> <li>e. Yello bolla suutha googo (harra shaakoy baawa)</li> <li>f. Yello keetha daketto</li> <li>g. Yelloppe guye suutha googo (harra shaakoy)</li> <li>h. Harra suutha googo</li> </ul> |  |
| 505 | Yelloppe sinthan uguntha googoy dizze?       | <ul style="list-style-type: none"> <li>a. Dees</li> <li>b. Baawa</li> </ul>                                                                                                                                                                                                                                                                                                                                |  |
| 506 | Bolla giddon suuthan suugethay guujoy dizze? | <ul style="list-style-type: none"> <li>a. Dees</li> <li>b. Baawa → 508</li> </ul>                                                                                                                                                                                                                                                                                                                          |  |
| 507 | Bolla dizza oyishas zaaroy dees gidiko,      | <ul style="list-style-type: none"> <li>a. “Pri-ikilapishiya”</li> <li>b. “Ikilapishiya”</li> <li>c. HELPPI</li> <li>d. Gaamida suutha suugetha</li> <li>e. Shaarethan bolla gaagiza suutha suugetha</li> </ul>                                                                                                                                                                                             |  |
| 508 | Suutha kuuthetez (Hb < 11g/dl)               | <ul style="list-style-type: none"> <li>a. Dees</li> <li>b. Baawa → 510</li> </ul>                                                                                                                                                                                                                                                                                                                          |  |
| 509 | Dees gidiko                                  |                                                                                                                                                                                                                                                                                                                                                                                                            |  |
|     | a. Hemogilobinne (g/dl)                      | _____                                                                                                                                                                                                                                                                                                                                                                                                      |  |
|     | b. Erettena                                  |                                                                                                                                                                                                                                                                                                                                                                                                            |  |
| 510 | “inifekishine” dizze?                        | <ul style="list-style-type: none"> <li>a. Dees</li> <li>b. Baawa → 512</li> </ul>                                                                                                                                                                                                                                                                                                                          |  |
| 511 | Dees gidiko                                  | <ul style="list-style-type: none"> <li>a. Errotenna “inifekishine”</li> <li>b. “Puriperal endometereyites”</li> <li>c. Pyilonepirayites”</li> <li>d. Suuttha marizetto</li> <li>e. “Peritonayites”</li> <li>f. “Parishal suupereshin”</li> <li>g. Wooba’ugunno</li> <li>h. “Sipilese”</li> <li>i. Harra “sisetemike inifekishene”</li> </ul>                                                               |  |
| 512 | “Dayitoshiya” dizze?                         | <ul style="list-style-type: none"> <li>a. Dees</li> <li>b. Baawa → 514</li> </ul>                                                                                                                                                                                                                                                                                                                          |  |
| 513 | Dees gidiki                                  | <ul style="list-style-type: none"> <li>a. Yello keetah daketo</li> <li>b. Yello bolla gami77o</li> <li>c. “Feto-pelivike disporoporishine”</li> </ul>                                                                                                                                                                                                                                                      |  |
| 514 | Harra “patojjine” dizze?                     | <ul style="list-style-type: none"> <li>a. Dees</li> </ul>                                                                                                                                                                                                                                                                                                                                                  |  |

|     |                                             |                                                                                                                                                                     |  |
|-----|---------------------------------------------|---------------------------------------------------------------------------------------------------------------------------------------------------------------------|--|
|     |                                             | b. Baawa <b>→ 516</b>                                                                                                                                               |  |
| 515 | Dees gidiko?                                | a. HIV/AIDS<br>b. “Imibolike dizize (tirobosis/amiotikke woyikko gasheyes imibolizime”<br>c. Wozanna haarige<br>d. “Sikile-celle dizize”<br>e. Harra (yotta: _____) |  |
| 516 | <b>Suutha na77a</b>                         |                                                                                                                                                                     |  |
|     | A. “Pirezentshine”                          | a. “Sepalike”<br>b. “Biriche”<br>c. “Tiransiverse/fase/birow”<br>d. Harra, yotta _____                                                                              |  |
|     | B. “Xoota”                                  | a. Adde<br>b. Maache<br>c. Erretenna                                                                                                                                |  |
|     | C. Yello bolla decheto                      | a. Dees<br>b. Baawa                                                                                                                                                 |  |
|     | D. Dees gidiko                              | yotta, _____                                                                                                                                                        |  |
|     | E. Na77ay harra hospitale daaketidde?       | a. Dees<br>b. Baawa                                                                                                                                                 |  |
|     | F. Na77ay “initensive kerre unite” geelide? | a. Geelides<br>b. Geelibenna                                                                                                                                        |  |

**Kaliddi dizza oyishata suutha na77ay hayiqida gidiko kuunitha**

| <b>Basso VII: Chekilisite 2 (Hayiqia na77as kunitha)</b>                                                                                                                                                                                                                                                                                                                                                                                                                                                                                                                                                                                                                                                                                                                                                                                                                                              |                                                                                          |                                                                                                                   |  |
|-------------------------------------------------------------------------------------------------------------------------------------------------------------------------------------------------------------------------------------------------------------------------------------------------------------------------------------------------------------------------------------------------------------------------------------------------------------------------------------------------------------------------------------------------------------------------------------------------------------------------------------------------------------------------------------------------------------------------------------------------------------------------------------------------------------------------------------------------------------------------------------------------------|------------------------------------------------------------------------------------------|-------------------------------------------------------------------------------------------------------------------|--|
| 601                                                                                                                                                                                                                                                                                                                                                                                                                                                                                                                                                                                                                                                                                                                                                                                                                                                                                                   | <b>Na77ay hayiqide?</b>                                                                  | <b>a. Hayiqides</b><br><b>b. Hayiqibena</b> → <b>Essa</b>                                                         |  |
| <b>Piligethan Dossan Gelidayis Bessiza Basso</b>                                                                                                                                                                                                                                                                                                                                                                                                                                                                                                                                                                                                                                                                                                                                                                                                                                                      |                                                                                          |                                                                                                                   |  |
| <p>Hello. Suunithay _____ Ariba mince yuniversitten othayis. Suutha na77ita hayiqos gathida hannotata bolla maraja shishayis. Hayissa maraja shisho bolla gelidda gishas daroppe galatayis. Nuni shishida oyishay suutha na77ita hayiqos gathiza hannotata bolla. Neppene nuni shisha zaroy ubbay xuuren oyiketes. Neppene hayiqida suutha na77a hannotan shiqida zaroy oddesika immetena. Ha piligethan geeloy dosatethanne zaaro immanas koyota oyishetas zaaro immota aggoy danda7etes woyikko oyisha domidda guyedippe zarro immota aggoy danda7etes. Gidoppe attin neeppe eketiza zaaro suutha na77itas kooshiz xena hannotas daroppe go77es.</p> <p>Oyishay diiko oyichanas dandi77etes, oyishay dizze?</p> <p>Oyisha doomo?</p> <p>Oyisha oyishiza daana firima: _____ gaalasa: _____</p> <p>Oyisha zaariza daanay erro giides <b>Dooma</b> oyisha zaariza daanay erro gibenna <b>Essa</b></p> |                                                                                          |                                                                                                                   |  |
| <b>Hayiqos gaathiza hannotata</b>                                                                                                                                                                                                                                                                                                                                                                                                                                                                                                                                                                                                                                                                                                                                                                                                                                                                     |                                                                                          |                                                                                                                   |  |
| 602                                                                                                                                                                                                                                                                                                                                                                                                                                                                                                                                                                                                                                                                                                                                                                                                                                                                                                   | Hayiqidda na77as ayya de77iza?                                                           | a. Daasu<br>b. Duuku                                                                                              |  |
| 603                                                                                                                                                                                                                                                                                                                                                                                                                                                                                                                                                                                                                                                                                                                                                                                                                                                                                                   | Zaaro imizay xena moya77icha?                                                            | a. Ee → <b>605</b><br>b. Deena                                                                                    |  |
| 604                                                                                                                                                                                                                                                                                                                                                                                                                                                                                                                                                                                                                                                                                                                                                                                                                                                                                                   | Zaaroy deena gidiko,                                                                     | a. Ayyo<br>b. Awa<br>c. Awa awa<br>d. Awa ayyo<br>e. Ayi awa<br>f. Ayi ayyo<br>g. Harra (yotta) _____             |  |
| 605                                                                                                                                                                                                                                                                                                                                                                                                                                                                                                                                                                                                                                                                                                                                                                                                                                                                                                   | Na77ay anani hayiqide?                                                                   | a. Hosipitalen<br>b. Xena xabiya<br>c. Xena keela<br>d. Harra hakime keetha<br>e. Sohon<br>f. Harra (yotta) _____ |  |
| 606                                                                                                                                                                                                                                                                                                                                                                                                                                                                                                                                                                                                                                                                                                                                                                                                                                                                                                   | Na77ay hayiqiday hakime keethan gidikko, haakime keetha sunitha, bootanne gallasa xaafa? | Sunitha _____<br>Gelidda gallasa _____                                                                            |  |

*Paatethan zaaretiza oyisha*

607. Na77ay waani hayiqidako yoota?

Oyisha oyishiza daana koyiro: zaaro zaariza daanay na77ay wanni hayiqidakko ba qalan yotto. Zaaro zaariza daanas ogge immoppa “harraba diko attin” daanay oniganaw gaathaw.

---

---

---

---

---

---

---

---

---

---

608. Zaaro immiza daanay pilligethan zaarishin kaliddi de77eza hannotateppe kaababa..

1. Guuso 2. Quufe 3. Puusha/bolla maadunitha 4. Bolla qohetto 5. Baana baletto 6. Fiite 7. Qoppe qaxonitta aggo 8. Tetanese 9. Kuufuno 10. Kosharikore 11. Marasimese 12. Shempo bolla wayetho 13. Esson shemppo 14. Yello bolla woyetho 15. Bolla paacce 16. Kilo guutha na77a 17. Gaasha na77a 18. Agginay gaakonitta yeletto 19. Niimoniya 20. Wooba /ugunno 21. Bolla biicha giido 22. Haara ba (yoota)\_\_\_\_\_

|     |                                                                           |                                                                                                                                                     |       |
|-----|---------------------------------------------------------------------------|-----------------------------------------------------------------------------------------------------------------------------------------------------|-------|
| 609 | Na77ay hayiqanappe sinthan ayyi keena saketidde?                          | _____ (gallasan)                                                                                                                                    |       |
| 610 | Hakime keetappe haara botan hakemetidde?                                  | a. Hakemitides<br>c. Hakenitibena                                                                                                                   | → 612 |
| 611 | Boolan dizza oyisha zaaroy haakime keetha gidikko,                        | a. Hospitalen<br>b. Xeena xaabiyan<br>c. Xeena keelan<br>d. Giile haakime keethan<br>e. Giile parimaasen, dhaale keethan<br>f. Harraba (yoota)_____ |       |
| 612 | Na77ay bolla paacey dizze?                                                | a. Dees<br>b. Baawa                                                                                                                                 | → 614 |
| 613 | Bollan dizza oyishas zaaroy dees gidiko,                                  | a. Huphe<br>b. Bolla<br>c. Kushe<br>d. Toofo<br>e. Haaraba (Yoota)<br>_____                                                                         |       |
| 614 | Na77ay shemppe?                                                           | a. Shempes<br>b. Shemppene                                                                                                                          |       |
| 615 | Na77ay dhama woykko xuuxo dhama?                                          | a. Dhames<br>b. Dhamene                                                                                                                             |       |
| 616 | Na77ay hayiqanappe sinthan dhama woykko shempo essire?                    | a. Essides<br>b. Essibenna                                                                                                                          | → 619 |
| 617 | Na77ay hayiqappe sinthan ayyi kennani dhama essire?                       | a. 1 gallasappe sinthan<br>b. 1-2 gallas<br>c. 2 gallasappe bollan                                                                                  |       |
| 618 | Ayyi keena gallasan na77ay damo esseri?                                   | a. 1 gallasappe shinthan<br>b. 1-2 gallas<br>c. 3-7 gallas<br>d. 8-14 gallas<br>e. 15-28 gallas                                                     |       |
| 619 | Na77ay koyirro waasi?                                                     | a. Waases<br>b. Waasena                                                                                                                             |       |
| 620 | Na77ay hayiqanappe sinthan waaso esseri?                                  | a. Essires<br>b. Essibenna                                                                                                                          | → 622 |
| 621 | Bollan dizza oyishas zaaroy essires gidiko,                               | a. <1 gallas<br>b. 1 gallasappe bolla                                                                                                               |       |
| 622 | Na77a hayiqos gathira saako saaketishin, esippazime/konivelizhiney dizze? | a. Dees<br>b. Baawa                                                                                                                                 |       |
| 623 | Na77a hayiqos gathira saako saaketishin, baana baaletidde?                | a. Baaletides<br>b. Baaletibena                                                                                                                     |       |

|     |                                                                                 |                                                      |  |
|-----|---------------------------------------------------------------------------------|------------------------------------------------------|--|
| 624 | Na77a hayiqos gathira saako saaketishin, huuphe phidhey puridde?                | a. Purires<br>b. Puribenna                           |  |
| 625 | Na77a hayiqos gathira saako saaketishin, did the neonate have tetansey dizze?   | a. Dees<br>b. Baawa                                  |  |
| 626 | Na77a hayiqos gathira saako saaketishin, bolla bicatoy dizze?                   | a. Dees<br>b. Baawa                                  |  |
| 627 | Na77a hayiqos gathira saako saaketishin, gulla zo77otetha/ mizhigetay dizze?    | a. Dees<br>b. Baawa                                  |  |
| 628 | Na77a hayiqos gathira saako saaketishin, bolla galibay zoo77ide/ miichey dizze? | a. Dees<br>b. Baawa                                  |  |
| 629 | Na77a hayiqos gathira saako saaketishin, bolla galiba shifita/ giishay dizze?   | a. Dees<br>b. Baawa                                  |  |
| 630 | Na77a hayiqos gathira saako saaketishin, bolla michy dizze?                     | a. Dees,<br>gamiday___gallasa<br>b. Baawa            |  |
| 631 | Na77a hayiqos gathira saako saaketishin, guusoy dizze?                          | a. Dees,<br>gamiday___gallasa<br>b. Baawa            |  |
| 632 | Na77a hayiqos gathira saako saaketishin, quufoy dizze?                          | a. Dees,<br>gamiday___gallasa<br>b. Baawa            |  |
| 633 | Na77a hayiqos gathira saako saaketishin, shemppo bolla wayithoy dizze?          | a. Dees,<br>gamiday___gallasa<br>b. Baawa            |  |
| 634 | Na77a hayiqos gathira saako saaketishin, esson shemppoy dizze?                  | a. Dees,<br>gamiday___gallasa<br>b. Baawa            |  |
| 635 | Na77a hayiqos gathira saako saaketishin, shemppo essidappe guye doomoy dizze?   | a. Dees<br>b. Baawa                                  |  |
| 636 | Na77a hayiqos gathira saako saaketishin, tiira siripheto dizze?                 | a. Dees<br>b. Baawa                                  |  |
| 637 | Na77a hayiqos gathira saako saaketishin, siidhe qaaxoy dizze?                   | a. Dees<br>b. Baawa                                  |  |
| 638 | Na77a hayiqos gathira saako saaketishin, goofinna miichay dizze?                | a. Dees<br>b. Baawa                                  |  |
| 639 | Na77a ayya HIV maramaretadde?                                                   | a. Maramaretadus<br>b. Marameretabeyku → <b>Essa</b> |  |
| 640 | Bollan dizza oyishas zaaroy maramaretadus gidiku wuxetey pozetive?              | a. Eyye<br>b. Deena                                  |  |
| 641 | Hayiqdda na77a ayya “AIDS” dees gidi yootida xeenaa moyanichay dizze?           | a. Dees<br>b. Deena                                  |  |

*Daroppe Gallatayis!!!*



### Amharic Version Questionnaire

| ተ.ቁ                             | መጠይቆች                    | መልስ                                                                      | መዝለል |
|---------------------------------|--------------------------|--------------------------------------------------------------------------|------|
| <b>ክፍል አንድ: መለያ</b>             |                          |                                                                          |      |
| 101                             | የሆስፒታል ስም                | ሀ. አርባ ምንጭ አጠቃላይ ሆስፒታል<br>ለ. ጨንቻ መጀመሪያ ደረጃ ሆስፒታል<br>ሐ. ሳዉላ አጠቃላይ ሆስፒታል   |      |
| 102                             | የሆስፒታል ኮድ                | ___/___/___                                                              |      |
| 103                             | መጠይቁን መሙላት የተጀመረበት ቀን    | ___/___/___                                                              |      |
| 104                             | ወርዳ                      | _____                                                                    |      |
| 105                             | ቀበል                      | _____                                                                    |      |
| 106                             | ሰፍሪ/ጎጥ                   | _____                                                                    |      |
| 107                             | ስልክ ቁጥር                  |                                                                          |      |
| 108                             | በአቅራቢያ ያለ ጤና ጣቢያ         |                                                                          |      |
| 109                             | በአቅራቢያ ጤና ክላ             |                                                                          |      |
| 110                             | የጤና ኤክስተንሲቭ ስምና ስልክ      |                                                                          |      |
| 111                             | ሆስፒታል የገቡበት ቀን           | ___/___/___ ዓ.ም                                                          |      |
| 112                             | የሆስፒታል ካሪድ ቁጥር           | _____                                                                    |      |
| 113                             | ሆስፒታል እንድትመጡ የሪገዉ ማን ነዉ. | ሀ. በራስ ተነሳሽነት<br>ለ. ከሌላ ጠና ጣቢያ ተልከ                                       |      |
| 114                             | በምን ትራስፖርት ነዉ. የመጣሽዉ.    | ሀ. በአምቡላስ<br>ለ. በህዝብ ትራስፖርት<br>ሐ. በግል መክና<br>መ. ለላ, ይጠቀስ_____            |      |
| <b>ክፍል ሁለት: የነባራዊ ሁኔታ ጥያቄዎች</b> |                          |                                                                          |      |
| 201                             | የእናት እድመ                 | _____ (በሙሉ አመተ)                                                          |      |
| 202                             | የጋብቻ ሁኔታ                 | ሀ. ባለ ትዳሪ<br>ለ. ያላገባች<br>ሐ. ባሏቸው ተባብረው<br>መ. የፈታች<br>ረ. በሲራ ምክንያት የተለያዩች |      |
| 203                             | ዘሪ                       | _____                                                                    |      |
| 204                             | የእናት የትምህርት ደረጃ          | ሀ. አልተማሪችም<br>ለ. አንደኛ ደረጃ(1-8)<br>ሐ. ሁለተኛ ደረጃ(9-12)<br>መ. ኮሌጅና ከዝሃ በላይ   |      |
| 205                             | የአባት የትምህርት ደረጃ          | ሀ. አልተማሪም<br>ለ. አንደኛ ደረጃ (1-8)<br>ሐ. ሁለተኛ ደረጃ (9-12)<br>መ. ኮሌጅና ከዝያ በላይ  |      |
| 206                             | ሀይማኖት                    | ሀ. አራቶዶስ<br>ለ. ካቶልክ                                                      |      |

|     |                          |                                                                   |  |
|-----|--------------------------|-------------------------------------------------------------------|--|
|     |                          | ሐ. ፕሮተስታንት<br>መ. ሙስልም<br>ረ. ባህልዊ                                  |  |
| 207 | የእናት የስራ ሁኔታ             | ሀ. የቤት እመቤት<br>ለ. ነጋደ<br>ሐ. የመንግስት ሰራተኛ<br>መ. የጉልበት ሰራተኛ          |  |
| 208 | የአባት የስራ ሁኔታ             | ሀ. አሪስ አደሪ<br>ለ. ነጋደ<br>ሐ. የመንግስት ሰራተኛ<br>መ. ሸማኔ<br>ረ. የጉልበት ሰራተኛ |  |
| 209 | መነፍሪያ ቦታ                 | ሀ. ከተማ<br>ለ. ገጠሪ                                                  |  |
| 210 | በአማካይ በወር ምን ያክል ግብ አላቹ? | ሀ. አዉ አለ<br>ለ. የለም                                                |  |

**ክፍል ሶስት: የአረጋገጥና የወልድ ጊዜ ሁኔታዎችና የምመጡ ቸግሮችን በተመለከተ መጠይቅ**

|     |                                         |                         |       |
|-----|-----------------------------------------|-------------------------|-------|
| 301 | ስንት ጊዜ አረጋገጥኻል?                         | _____ (በቁጥር) የመጀመሪያ ከሆነ | → 401 |
| 302 | ስንት ጊዜ ወልደኻል?                           | _____ (በቁጥር)            |       |
| 303 | ሞተዉ የተወለዱ ስንት ናቸዉ?                      | _____                   |       |
| 304 | ዉረጃ አጋጥሞኻል?                             | ሀ. አዎ<br>ለ. አይ          |       |
| 305 | ያሁኑ አረጋገጥኛና የቀድሞ በማሃላቸዉ ስንት ወር ልዩነት አለ? | _____ (በወር)             |       |
| 306 | በህይወት ከተወለዱ በሀላ የሞቱ ስንት ናቸዉ?            | ሀ. አዎ<br>ለ. አይ          |       |

**ክፍል አራት: የእናቶች ሁኔታ ላይ መጠይቅ**

|     |                                        |                    |       |
|-----|----------------------------------------|--------------------|-------|
| 401 | ለዝህ አረጋገጥና ቅድመ ወልድ ክትትል አድረገኻል?        | ሀ. አዎ<br>ለ. አላደረኩም | → 403 |
| 402 | ከላይ ላለዉ ጥያቄ መልሱ አዎ ከሆነ፤ ስንት ጊዜ አድረገኻል? | _____              |       |
| 403 | ድህረ ወለድ ክትትል አለሽ?                      | ሀ. አዎ<br>ለ. የለኝም   |       |

**ክፍል አምስት: በወልድ ጊዜ ሁኔታዎችና የምመጡ ቸግሮችን በተመለከተ መጠይቅ**

|     |                                   |                                                                                                                      |       |
|-----|-----------------------------------|----------------------------------------------------------------------------------------------------------------------|-------|
| 501 | የወልድሽዉ ቀን?                        | ___/___/___                                                                                                          |       |
| 502 | በትኛዉ የአላለድ አይነት ነዉ የወለድሽዉ?        | ሀ. በትክክለኛዉ የወልድ መንገግ<br>ለ. በስኬስ<br>ሐ. መሳሪያ ታጊዘዉ                                                                      |       |
| 503 | ደም መፍሰስ አጋጥሞኻል?                   | ሀ. አዎ<br>ለ. አላጋጠመኝም                                                                                                  | → 505 |
| 504 | ከላይ ላለዉ ጥያቄ መልሱ አዎ ከሆነ፤ በምን አይነት? | ሀ. ፒላሰንታ ፕረሽያ<br>ለ. ፒላሰንታ ኦብራቫሽን<br>ሐ. ፒላሰንታ አክራታ/አንክራታ/ፕረክራታ<br>መ. ረትሮ ፒላሰንታል ሄማቶማ<br>ረ. ለላ የመጀመሪያ ትራይምስተረ የደም መፍሰስ |       |

|                                 |                                    |                                                                                                                                                                                  |  |
|---------------------------------|------------------------------------|----------------------------------------------------------------------------------------------------------------------------------------------------------------------------------|--|
|                                 |                                    | <p>ሸ. በወልድ ጊዜ ደም መፍሰስ (ያልተለየ)<br/> ቀ. የማፀን መተረተረለላ<br/> በ. ከወልድ በሃላ ደም መፍሰስ (ያልተለየ)<br/> ቸ. ለላ ደም መፍሰስ (ይጠቀስ)_____</p>                                                           |  |
| 505                             | የሸንት ወሃሽ የፈሰሰው መቸ ነው?              | <p>ሀ. ምጡ ከመጀመሩ በፍት<br/> ለ. ምጥ ላይ እያለው</p>                                                                                                                                        |  |
| 506                             | የደም ጊፍትሽ ጨምሮ ያወቃል?                 | <p>ሀ. አዎ<br/> ለ. አላጋጠመኝም → 508</p>                                                                                                                                               |  |
| 507                             | ከላይ ላለው ጥያቄ መልሱ አዎ ከሆነ፤ የትኛው አይነት? | <p>ሀ. ፒረ-እክላምሽያ<br/> ለ. እክላምሽያ<br/> ሐ. ሄልፒ ስንድረም<br/> መ. የቆየ የደም ጊፍት<br/> ረ. የእረጊዝና ጊዜ ደም ጊፍት</p>                                                                                |  |
| 508                             | ደም ማነስ አጋጥሞሻል?                     | <p>ሀ. አዎ<br/> ለ. አላጋጠመኝም → 510</p>                                                                                                                                               |  |
| 509                             | ከላይ ላለው ጥያቄ መልሱ አዎ ከሆነ፤            |                                                                                                                                                                                  |  |
|                                 | ሀ. “ህሞግሎብን ለቫል (g/dl)”             | _____                                                                                                                                                                            |  |
|                                 | ለ. አይታወቅም                          |                                                                                                                                                                                  |  |
| 510                             | “እንፈክሽን” አጋጥሞሻል                    | <p>ሀ. አዎ<br/> ለ. አላጋጠመኝም → 512</p>                                                                                                                                               |  |
| 511                             | ከላይ ላለው ጥያቄ መልሱ አዎ ከሆነ፤            | <p>ሀ. ያልተለየ “እንፈክሽን”<br/> ለ. “ፑረፑርያል እንደመትረያተስ”<br/> ሐ. “ፓይሎንፍረያተስ”<br/> መ. “ሰፍቲሰምያ”<br/> ረ. “ፓረቶናይተስ”<br/> ሸ. “ፓርታል ሱፐርሽን”<br/> ቀ. ወባ<br/> በ. ቅጥኝ<br/> ቸ. ለላ “ስለተምክ እንፈክሽን”</p> |  |
| 512                             | ምጥሽ አስቸግሮሽ ነበረ?                    | <p>ሀ. አዎ<br/> ለ. አይደለም → 514</p>                                                                                                                                                 |  |
| 513                             | ከላይ ላለው ጥያቄ መልሱ አዎ ከሆነ፤            | <p>ሀ. “ዩትረያን ፒር ራፒቸር”<br/> ለ. “ፐሮሎንግድ ለበር”<br/> ሐ. “ፈቶፐልቭ ድስፒሮፖርሽን”</p>                                                                                                          |  |
| 514                             | ለላ “ፓቶጅን”                          | <p>ሀ. አለ<br/> ለ. የለም → 516</p>                                                                                                                                                   |  |
| 515                             | ከላይ ላለው ጥያቄ መልሱ አዎ ከሆነ፤            | <p>ሀ. “ቫይረስ”<br/> ለ. “እቦልክ ድዝዝ”<br/> ሐ. የልብ በሽታ<br/> መ. “ስክል ሰል ድዝዝ”<br/> ረ. ለላ( _____)</p>                                                                                      |  |
| <b>የጨቅላ ህፃናት ሁኔታዎችና እና ችግሮች</b> |                                    |                                                                                                                                                                                  |  |

|     |                             |                                                               |  |
|-----|-----------------------------|---------------------------------------------------------------|--|
| 516 | ፕሮዘንቲቭን                     | ሀ. “ሰፋ-ልክ”<br>ለ. “ብረቻ”<br>ሐ. “ትራስቨርስ/ፈስ/ብሮዉ.<br>መ. ለላ( _____) |  |
|     | የጨቅላ ህፃኑ ምን ይሆናል?           | ሀ. ወንድ<br>ለ. ሴት                                               |  |
|     | “ብረዝ ትሮዉማ”                  | ሀ. አለ<br>ለ. የለም                                               |  |
|     | ከላይ ላለዉ ጥያቄ መልሱ አዎ ከሆነ፤     | _____                                                         |  |
|     | ጨቅላ ህፃኑ ለላ ህክምና ቦታ ተልኮ ነበር? | ሀ. አለ<br>ለ. የለም                                               |  |
|     | የጨቅላ ህፃን ጽኑ ህመማን ግብቶ ነበር    | ሀ. አዎ<br>ለ. አይደለም                                             |  |

እሄ ቅፅ የምሞላው ጨቅላ ህፃኒ ከሞተ ብቻ ነው። ለዝህ ቅፅ መልስ ልመልስ የምችለው ጤና ባለሞያ ወይም ከሞተው ጨቅላ ህፃን ጋር ዝምድና ያለው ሰው ብሆን ይመረጣል።

|                                                                                                                                                                                                                                                                                                                                                                                                                                                                                                                                                                                                                                                                                                                                                                                                              |                                                              |
|--------------------------------------------------------------------------------------------------------------------------------------------------------------------------------------------------------------------------------------------------------------------------------------------------------------------------------------------------------------------------------------------------------------------------------------------------------------------------------------------------------------------------------------------------------------------------------------------------------------------------------------------------------------------------------------------------------------------------------------------------------------------------------------------------------------|--------------------------------------------------------------|
| <b>ክፍል ሰባት:-ቅፅ ሁለት (ጨቅላ ህፃኑ ከሞተ ብቻ ይሞላ)</b>                                                                                                                                                                                                                                                                                                                                                                                                                                                                                                                                                                                                                                                                                                                                                                  |                                                              |
| <b>601. ህጻኑ ሞትዋል?</b>                                                                                                                                                                                                                                                                                                                                                                                                                                                                                                                                                                                                                                                                                                                                                                                        | ሀ. አዎ<br>ለ. አልሞተም <span style="font-size: 2em;">→</span> አቁም |
| <b>የስምምነት ቅፅ</b>                                                                                                                                                                                                                                                                                                                                                                                                                                                                                                                                                                                                                                                                                                                                                                                             |                                                              |
| <p>ጤና ይሰጥልኝ! ስሜ _____ እኔ የምሰራው አረባ ምንጭ ዩኒቨርሲቲ ነው። እኛ የምንሰበሰብበው መረጃ ህይወታቸው ያለፈው ጨቅላ ህፃናት ህይወታቸው እንደያፍ ያረጉት ምክንያቶችን በተመለከተ ነው። ስለዝህ በመሳተፊ በጣም እናመሰግናለን። እንኛ የምንጠይቀው ጨቅላ ህፃናት እንድሞቱ ላረጉ ሁኔታዎችን በተመለከተ ነው። ከረሶ የምሰበሰበው የትኛውም አይነት መረጃ በምስጥረ ይጠበቃል። እረሰውም ሆነ የሞተው ጨቅላ ህፃን በተመለከተ የተሰበሰበው መረጃ በትኛውም አይነት ምክንያት ከመረጃ ሰብሳቢዎች ወጭ አይሰጥም።</p> <p>በዝህ ጥናት መሳተፍ በፍላጎት ስሆን ለአንድ አንድ ጥያቄዎች ሆነ ለሁሉም ጥያቄዎች አለመመለስ ሙሉ መፍት አለዎት። መጠይቁን በሙሉ በትኛውም ሰዓት ማቆም ሆነ አለመመለስ ይቻላል፤ ማቆም ምንም ነገር ልያስከትሎ አይችልም። ነገር ግን የረሶ መሳተፍ ለዝህ ጥናት መሳካት ትልቅ ምና መኖሩና በጤና ተቋማት የምሰጡ አግልግሎቶችን ለማስተካከል ጥሩ ግባዓት መሆኑን በአፅኖት እንገልፃለን።</p> <p>በዝህ ሰዓት ስለዝህ መጠይቅ ጥቅምና የተካተቱ ነግሮችን መጠየቅ ይፈልጋሉ?<br/>                 አሁን መጠይቁ መጀመሪያ እችላለሁ?<br/>                 የመረጃ ሰብሳቢው ፊርማ: _____ ቀን: _____<br/>                 ተጠያቂው ከተሰማማ <u>ይቀጥሉ</u> ካልተሰማማ <u>ያቁሙ</u></p> |                                                              |

|     |                                                                 |                                                                                          |            |
|-----|-----------------------------------------------------------------|------------------------------------------------------------------------------------------|------------|
| 602 | በዝህ ሰዓት እናቷ/ቱ በህይወት አሉች?                                        | ሀ. አዎ<br>ለ. የለችም                                                                         |            |
| 603 | መላሹ ጤና ባለሞያ ነዎ?                                                 | ሀ. አዎ <span style="font-size: 2em;">→</span><br>ለ. አይደለም                                 | <b>605</b> |
| 604 | ከላይ ላለው ጥያቄ መልሱ አይደለም ከሆኑ ከሞተው ጨቅላ ህፃን ጋር ምን አይነት ግንኙነት ነው ያለው? | ሀ. እናት<br>ለ. አባት<br>ሐ. የወንድ አያት<br>መ. የሴት አያት<br>ረ. አጎት<br>ሸ. አክስት<br>ቀ. ሌላ (ይጠቀስ) _____ |            |
| 605 | ጨቅላ ህፃኑ የት ነው የሞተዎ?                                             | ሀ. ሆስፒታል<br>ለ. ጤና ጣቢያ<br>ሐ. ጤና ኬላ<br>መ. ወደ ጤና ተቋም እየሄደች<br>ረ. ቤት<br>ሸ. ላለ(ይጠቀስ) _____    |            |
| 606 | ህይወቱ ያለፈው ጤና ተቋም ከሆኑ የጤና ተቋሙ ስሙና አድራሻው ይጻፍ?                     | የተቋሙ ስምና አድራሻ _____<br>የገባበት ቀን _____                                                    |            |

**በማብራራት የምገለፅ የታሪክ ጥያቄ**

607. የጨቅላ ህፃኑ የህመም ሁኔታውና ለሞት ያበቃው ነገር ማባራራት ይችላሉ?  
**ለጠያቂው ትዝብ:** መላሹ የጨቅላ ህፃኑ የህመም ሁኔታውና ለሞት ያበቃው ነገር በራሱ ቃል እንደያብራራና ተጨማሪ ሃሳብ እድያዎራ ከመጠየቅ በስተቀር ማዎጣጣት እንደማይቻል ማዎቅ አለበት።

---



---



---

608. ጊዜ ከወሰዱ በላይ መላሹ ስያብራረ ከሰጠዉ ዉስጥ ካለ ከምክተሉት ያክብቡ:: ለቀሩት ጥያቄዉች የምክተሉዉን እንደ መረሀ ይጠቀሙ::

1. ተቅማጥ 2. ሳል 3. ትኩሳት 4. ሸፍታ 5. ጉዳት 6. ኤራስን መሳት 7. ፊት 8. የማጅራት ግትረ 9. ተታነስ 10. ኩፍኝ
11. ካሽረኮረ 12. ማረስመስ 13. የመተነፍስ ችግረ 14. ቶሎ ቶሎ መተንፈስ 15. የተወሳሰበ ወለድ 16. ማልፈረመሸን
17. በጣም ትንሽ ህፃን 18. በጣም ቀጭን ህፃን 19. ጊዜዉ ሳይደረስ የተወለደ 20. ንሞንያ 21. ወባ 22. ጃወንድስ 23. ለላ (ይጠቀስ)

|     |                                                                                                                                           |                                                                                                                      |       |
|-----|-------------------------------------------------------------------------------------------------------------------------------------------|----------------------------------------------------------------------------------------------------------------------|-------|
| 609 | ህፃኑ ከሞሞቱ በፊት ምን ያክል ጊዜ ታሟል?                                                                                                               | _____ (በቀን)                                                                                                          |       |
| 610 | ህፃኑ ስታመም ከቤት ዉጭ ታክመዉ(ተንከባክበዉ) ያዉቃል?                                                                                                       | ሀ. አዎ<br>ለ. አያዉቅም _____                                                                                              | → 612 |
| 611 | ከላይ ላለዉ ጥያቄ መልሱ አዎ ከሆኑ፣ የት ነዉ የተንከባክበዉ? (ከአንድ በላይ መልስ ይቻላል፤ የምክተሉት መሆናቸዉን ያወጣጡ)<br>1. የመንግስት ሆስፒታል<br>2. የመንግስት ጤና ጣብያ<br>3. የመንግስት ጤና ኬላ | ሀ. የመንግስት ሆስፒታል<br>ለ. የመንግስት ጤና ጣብያ<br>ሐ. የመንግስት ጤና ኬላ<br>መ. የግል ክልንክ<br>ረ. የግል ፓረማስ፣ የመሀዳንት መስጫ<br>ሸ. ለላ(ይጠቀስ)_____ |       |
| 612 | የሞተዉ ህፃን ስወለድ የአካል ችግረ አለበት?                                                                                                              | ሀ. አዎ<br>ለ. የለበትም _____                                                                                              | → 614 |
| 613 | ከላይ ላለዉ ጥያቄ መልሱ አዎ ከሆኑ፣ የምን አይነት ችግረ? (ከአንድ በላይ መልስ ይቻላል)                                                                                 | ሀ. የጭንቅላት<br>ለ. የሰዉነት<br>ሐ. የእጅ/የእጅ የመዳፍ<br>መ. የእግረ/የእግረ መዳፍ<br>ረ. ለላ (ይጠቀስ)_____                                    |       |
| 614 | ህፃኑ ከተወለድ በላይ ስተነፍስ ነበረ?                                                                                                                  | ሀ. አዎ<br>ለ. አይተነፍስም                                                                                                  |       |
| 615 | ህፃኑ ከተወለድ በላይ ጡት ወይም ጡጦ ስስብ ነበረ?                                                                                                          | ሀ. አዎ<br>ለ. አይስብም/አይጠባም                                                                                              |       |
| 616 | ህፃኑ ጡት መሳብ ያቆመዉ በትክክል ከጀመረ በላይ ነዉ?                                                                                                        | ሀ. አዎ<br>ለ. አይደለም _____                                                                                              | → 618 |
| 617 | ከላይ ላለዉ ጥያቄ መልሱ አዎ ከሆኑ፣ ከሞሞቱ በፍት ምን ያክል ጊዜ አቁሞ ነዉ?                                                                                        | ሀ. ከ1 ቀን በታች<br>ለ. ከ1-2 ቀን<br>ሐ. ለ2 ቀን በላይ                                                                           |       |
| 618 | ከላይ በተቁ 716 ላለዉ ጥያቄ መልሱ አዎ ከሆኑ፣ ከተወለደ በስንተኛ ቀኑ ነዉ ጡት መሳብ ያቆመዉ?                                                                            | ሀ. ከ1 ቀን በታች<br>ለ. ከ1-2 ቀን<br>ሐ. ከ3-7 ቀን<br>መ. ከ8-14 ቀን<br>ረ. ከ15-28 ቀን                                              |       |

|     |                                                              |                                 |       |
|-----|--------------------------------------------------------------|---------------------------------|-------|
| 619 | ህፃኑ ስወለድ ጮሆ ነበረ?                                             | ሀ. አዎ<br>ለ. አልጮሄም               |       |
| 620 | ህፃኑ ከተወለድ በሃላ መጮሁን አቁሞ ነበረ?                                  | ሀ. አዎ<br>ለ. አላቆመም               | → 622 |
| 621 | ከላይ ላለው ጥያቄ መልሱ አዎ ከሆኑ፣ ከሞሞቱ በፍት ጡት መሳብ ምን ያክል ጊዜ አቁሞ ነው?    | ሀ. ከ1 ያነሰ<br>ለ. አንድ ቀንና ከዝሃ በላይ |       |
| 622 | ህፃኑ ህይወቱ እንድያፍ ያረገውን ህመም ስታመም እስፓዝም/ኮንቨልሽን አለበት?             | ሀ. አዎ<br>ለ. የለበትም               |       |
| 623 | ህፃኑ ህይወቱ እንድያፍ ያረገውን ህመም ስታመም አራሱን ስቶ ነበረ?                   | አ. አዎ<br>ለ. አልሳታም               |       |
| 624 | ህፃኑ ህይወቱ እንድያፍ ያረገውን ህመም ስታመም በልጁ ፎንታሊን አለበት?                | ሀ. አዎ<br>ለ. የለበትም               |       |
| 625 | ህፃኑ ህይወቱ እንድያፍ ያረገውን ህመም ስታመም ቴታነስ አለበት?                     | ሀ. አዎ<br>ለ. የለበትም               |       |
| 626 | ህፃኑ ህይወቱ እንድያፍ ያረገውን ህመም ስታመም አይኑ ወደ ብጫ ተቀይሮ ነበረ?            | ሀ. አዎ<br>ለ. አልተቀየረም             |       |
| 627 | ህፃኑ ህይወቱ እንድያፍ ያረገውን ህመም ስታመም የብረት ጫፍ ላይ መቅላት ወይም ፈሳሽ ነበረበት? | ሀ. አዎ<br>ለ. የለበትም               |       |
| 628 | ህፃኑ ህይወቱ እንድያፍ ያረገውን ህመም ስታመም የሰውነት መሞቅ ወይም መቅላት አለበት?       | ሀ. አዎ<br>ለ. የለበትም               |       |
| 629 | ህፃኑ ህይወቱ እንድያፍ ያረገውን ህመም ስታመም በቆዳ ላይ ሽፍታና መግል የቋጠረ ነገረ ነበረ?  | ሀ. አዎ<br>ለ. የለውም                |       |
| 630 | ህፃኑ ህይወቱ እንድያፍ ያረገውን ህመም ስታመም ትኩሳት ነበረበት?                    | ሀ. አዎ፣ ለ___ ቀን የቆየ<br>ለ. የለውም   |       |
| 631 | ህፃኑ ህይወቱ እንድያፍ ያረገውን ህመም ስታመም ተቅማጥ ነበረበት?                    | ሀ. አዎ፣ ለ___ ቀን የቆየ<br>ለ. የለውም   |       |
| 632 | ህፃኑ ህይወቱ እንድያፍ ያረገውን ህመም ስታመም ሳል አለው?                        | ሀ. አዎ፣ ለ___ ቀን የቆየ<br>ለ. የለውም   |       |
| 633 | ህፃኑ ህይወቱ እንድያፍ ያረገውን ህመም ስታመም የመተንፈስ ችግረ ነበረው?               | ሀ. አዎ፣ ለ___ ቀን የቆየ<br>ለ. የለውም   |       |
| 634 | ህፃኑ ህይወቱ እንድያፍ ያረገውን ህመም ስታመም ቶሎቶሎ ስተንፍስ ነበረ?                | ሀ. አዎ፣ ለ___ ቀን የቆየ<br>ለ. አይደለም  |       |
| 635 | ህፃኑ ህይወቱ እንድያፍ ያረገውን ህመም ስታመም ለብዙ ሰዓት                        | ሀ. አዎ<br>ለ. የለውም                |       |

|     |                                                     |                       |       |
|-----|-----------------------------------------------------|-----------------------|-------|
|     | መተንፍስ አቁመው እህፃኑ ንደግና የጀመረበት ሁኔታ ነበረው?               |                       |       |
| 636 | ህፃኑ ህይወቱ እንድያፍ ያረገውን ህመም ስታመም ቸስት እንድረወግ ነበረው?      | ሀ. አዎ<br>ለ. የለውም      |       |
| 637 | ህፃኑ ህይወቱ እንድያፍ ያረገውን ህመም ስታመም የአፍንጫ ጫፍ መንቀሳቀስ ነበረው? | ሀ. አዎ<br>ለ. የለውም      |       |
| 638 | ህፃኑ ህይወቱ እንድያፍ ያረገውን ህመም ስታመም ንሞንያ(የብረድ በሽታ) ነበረው?  | ሀ. አዎ<br>ለ. የለውም      |       |
| 639 | የህፃኑ እናት ኤቸአይቨ ተመረምራለች?                             | ሀ. አዎ<br>ለ. አለተመረመረችም | → አቁም |
| 640 | ከላይ ላለው ጥያቄ መልሱ አዎ ከሆኔ፣ ውጤቱ ፖዘቲቭ ነበረ?               | ሀ. አዎ<br>ለ. አይደለም     |       |
| 641 | የህፃኑ እናት በጤና ባለሙያ ኤድስ አለብሽ ተብላ ታወቃለች?               | ሀ. አዎ<br>ለ. አታቅም      |       |

አመሰግናለሁ !!!
